# Supplementary material
Source: PubMed Central journal article supplement (PMC8602868)
Supplement: NIHMS1688164-supplement-Supplementary_Materials__figures__tables.pdf [file NIHMS1688164-supplement-Supplementary_Materials__figures__tables.pdf]

**Supplementary Table 1.** Education control group content (parents and teens)

| <b>Session</b> | <b>Topics covered</b>                             | <b>Sources</b>                                                                                                                                         |
|----------------|---------------------------------------------------|--------------------------------------------------------------------------------------------------------------------------------------------------------|
| 1              | Difference between acute and chronic pain         | <a href="http://www.webmap2.com">www.webmap2.com</a>                                                                                                   |
| 2              | Pain assessment; Pain treatment                   | www.webmd.com<br>www.aboutkidshealth.ca                                                                                                                |
| 3              | Causes of chronic pain                            | www.med.umich.edu<br>www.aboutkidshealth.ca                                                                                                            |
| 4              | Overview of six different pain conditions         | http://kidshealth.org<br>www.webmd.com<br>www.drugs.com<br>http://orthoinfo.aaos.org<br>http://my.clevelandclinic.org<br>www.fibromyalgia-symptoms.org |
| 5              | Transmission of pain messages: pain and the brain | www.aboutkidshealth.ca                                                                                                                                 |
| 6              | Chronic pain management; disparities in pain      | http://chapinandrussell.com<br>www.aboutkidshealth.org/ca<br>www.nationalpainfoundation.org                                                            |
| 7              | Pain as a public health problem                   | http://health.yahoo.net<br>www.webmd.com                                                                                                               |
| 8              | Myths about pain; parenting a child with pain     | www.aboutkidshealth.ca<br>www.nationalpainfoundation.org                                                                                               |

**Supplementary Table 2.** Standardized regression coefficients ( $\beta$ ), standard errors, and statistical significance for the full linear mixed effects models predicting GI symptoms, abdominal pain, and pain interference

|                                                    | <i>Treatment Outcome</i>   |                               |                                  |
|----------------------------------------------------|----------------------------|-------------------------------|----------------------------------|
|                                                    | GI Symptoms<br>$\beta(SE)$ | Abdominal Pain<br>$\beta(SE)$ | Pain Interference<br>$\beta(SE)$ |
| <b>Constant</b>                                    | 0.09<br>(0.26)             | 0.87***<br>(0.31)             | 43.96***<br>(3.05)               |
| <b>Age</b>                                         | 0.06***<br>(0.02)          | 0.03<br>(0.02)                | -0.04<br>(0.20)                  |
| <b>Male</b>                                        | 0.01<br>(0.04)             | 0.08*<br>(0.04)               | 1.20**<br>(0.41)                 |
| <b>Piece 1</b>                                     | -0.02***<br>(0.01)         | -0.03***<br>(0.01)            | 0.01<br>(0.08)                   |
| <b>Piece 2</b>                                     | 0.003<br>(0.003)           | -0.002<br>(0.004)             | -0.07*<br>(0.04)                 |
| <b>Treatment<br/>(reference group =<br/>EDU)</b>   | -0.08<br>(0.08)            | -0.09<br>(0.10)               | 0.47<br>(0.98)                   |
| <b>FAP Subgroup (reference group = LPA)</b>        |                            |                               |                                  |
| HPD                                                | 1.06***<br>(0.10)          | 1.32***<br>(0.12)             | 13.58***<br>(1.25)               |
| HPA                                                | 0.51***<br>(0.10)          | 0.85***<br>(0.12)             | 7.10***<br>(1.21)                |
| <b>Treatment (reference group = EDU) x Time</b>    |                            |                               |                                  |
| CBT x Piece 1                                      | 0.01<br>(0.01)             | 0.01<br>(0.01)                | 0.05<br>(0.08)                   |
| CBT x Piece 2                                      | -0.001<br>(0.003)          | -0.004<br>(0.004)             | -0.04<br>(0.04)                  |
| <b>FAP Subgroup (reference group = LPA) x Time</b> |                            |                               |                                  |
| HPD x Piece 1                                      | -0.02**<br>(0.01)          | -0.03**<br>(0.01)             | -0.28**<br>(0.10)                |
| HPD x Piece 2                                      | -0.01<br>(0.003)           | -0.01<br>(0.005)              | 0.01<br>(0.04)                   |
| HPA x Piece 1                                      | -0.01<br>(0.01)            | -0.02*<br>(0.01)              | -0.22*<br>(0.10)                 |
| HPA x Piece 2                                      | -0.003<br>(0.003)          | -0.001<br>(0.005)             | 0.06<br>(0.04)                   |

**Treatment (reference group = EDU) x FAP Subgroup (reference group = LPA)**

|           |                  |                |                 |
|-----------|------------------|----------------|-----------------|
| CBT x HPD | 0.24**<br>(0.10) | 0.06<br>(0.12) | -0.51<br>(1.20) |
| CBT x HPA | 0.09<br>(0.10)   | 0.17<br>(0.12) | 0.30<br>(1.19)  |

**Treatment (reference group = EDU) x FAP Subgroup (reference group = LPA) x Time**

|                            |                    |                    |                 |
|----------------------------|--------------------|--------------------|-----------------|
| CBT x HPD x<br>Piece 1     | -0.02**<br>(0.01)  | -0.02*<br>(0.01)   | -0.09<br>(0.10) |
| CBT x HPD x<br>Piece 2     | -0.0003<br>(0.003) | 0.01<br>(0.005)    | 0.04<br>(0.04)  |
| CBT x HPA x<br>Piece 1     | -0.01<br>(0.01)    | -0.02<br>(0.01)    | -0.06<br>(0.10) |
| CBT x HPA x<br>Piece 2     | -0.0000<br>(0.003) | -0.0002<br>(0.005) | 0.02<br>(0.04)  |
| Observations               | 1,143              | 1,134              | 1,140           |
| Log Likelihood             | -1,061.80          | -1,366.99          | -3,898.74       |
| Akaike Inf. Crit.          | 2,173.61           | 2,783.98           | 7,847.49        |
| Bayesian Inf. Crit.        | 2,299.20           | 2,909.38           | 7,973.01        |
| Marginal R <sup>2</sup>    | 0.26               | 0.28               | 0.25            |
| Conditional R <sup>2</sup> | 0.71               | 0.67               | 0.64            |

*Note:*

\*p&lt;0.05; \*\*p&lt;0.01; \*\*\*p&lt;0.001

The coefficient of determination (R<sup>2</sup>) reflects the total variance in the outcome variable explained by the predictors in each model. Marginal and conditional R<sup>2</sup> values for mixed models are calculated based on Nakagawa et al., (2017)<sup>18</sup> where the marginal R<sup>2</sup> considers only the variance of fixed effects and the conditional R<sup>2</sup> considers both fixed and random effects.

**Supplementary Table 3.** Means and standard deviations (SDs) for outcome measures across timepoints by treatment condition

|                   |                     | Treatment Period (Piece 1) |                   | Follow-up Period (Piece 2) |                 |                  |
|-------------------|---------------------|----------------------------|-------------------|----------------------------|-----------------|------------------|
| Outcome           | Treatment Condition | T0: Baseline               | T1: Mid-Treatment | T2: Post-Treatment         | T3: 6-month FU  | T4: 12-month FU  |
| GI Symptoms       | CBT                 | 1.63<br>(0.77)             | 1.21<br>(0.76)    | 1.09<br>(0.68)             | 0.94<br>(0.74)  | 0.96<br>(0.78)   |
|                   | EDU                 | 1.57<br>(0.73)             | 1.30<br>(0.79)    | 1.14<br>(0.79)             | 1.10<br>(0.79)  | 1.10<br>(0.84)   |
| Abdominal Pain    | CBT                 | 2.24<br>(0.86)             | 1.70<br>(0.77)    | 1.48<br>(0.90)             | 1.22<br>(0.94)  | 1.17<br>(1.00)   |
|                   | EDU                 | 2.27<br>(0.93)             | 1.90<br>(0.99)    | 1.55<br>(1.02)             | 1.50<br>(0.99)  | 1.37<br>(1.05)   |
| Pain Interference | CBT                 | 52.00<br>(8.34)            | 51.45<br>(9.83)   | 49.11<br>(8.87)            | 47.72<br>(9.46) | 46.59<br>(10.30) |
|                   | EDU                 | 51.68<br>(8.67)            | 51.00<br>(10.25)  | 48.90<br>(9.29)            | 48.64<br>(9.79) | 47.90<br>(9.91)  |

Scores for Children's Somatic Symptoms Inventory (GI Symptoms) and Abdominal Pain Index were normalized to a 4-point scale. The PROMIS Pain Interference is presented using T Scores.
